# Supplementary material for: Ultradispersed IrxNi clusters as bifunctional electrocatalysts for high-efficiency water splitting in acid electrolytes
Source: Royal Society of Chemistry journal article supplement (doi:10.1039/d1ra06136d), 2021-01-01
Supplement: d1ra06136d1.pdf [file d1ra06136d1.pdf]

## Supporting information

# Ultradispersed $\text{Ir}_x\text{Ni}$ clusters as Bifunctional Electrocatalysts for High-Efficiency Water Splitting in Acid Electrolytes

Xiaojie Zhao, Ying Chang\*, Jiang Ji, Jingchun Jia\*\*, Meilin Jia

College of Chemistry and Environmental Science, Inner Mongolia Key Laboratory of Green Catalysis and Inner Mongolia Collaborative Innovation Center for Water Environment Safety, Inner Mongolia Normal University, Hohhot, 010022, China.

\*Corresponding author. E-mail: [changying@imnu.edu.cn](mailto:changying@imnu.edu.cn), [jjc1983@126.com](mailto:jjc1983@126.com)

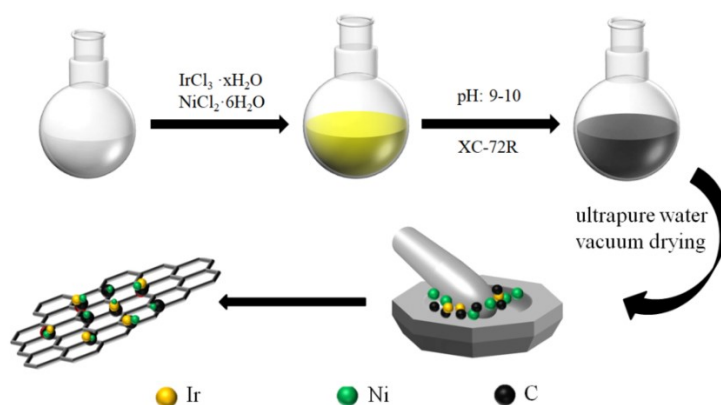

Figure S1. Synthesis diagram of  $\text{Ir}_x\text{Ni}$  clusters was prepared by oil bath.

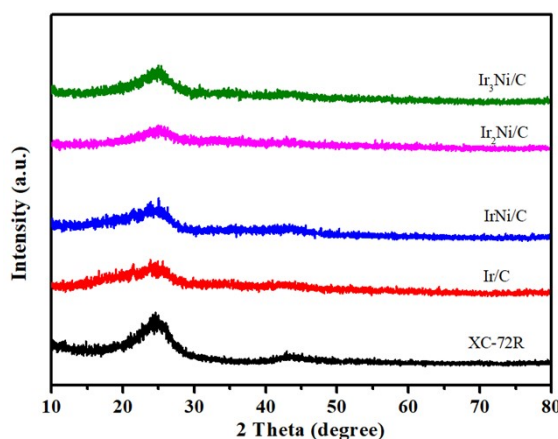

Figure S2. XRD patterns of XC-72R Vulcan carbon, Ir/C, IrNi/C,  $\text{Ir}_2\text{Ni/C}$  and  $\text{Ir}_3\text{Ni/C}$ .

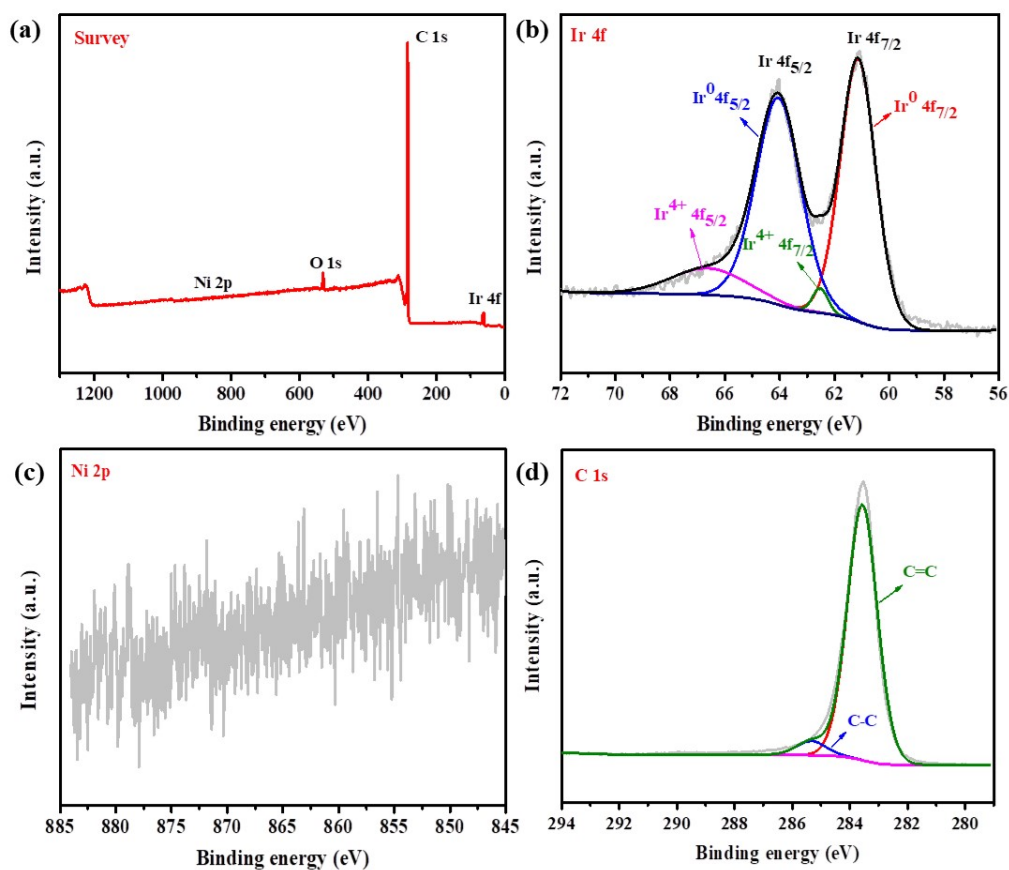

**Figure S3.** XPS spectra of Ir<sub>2</sub>Ni/C: (a) survey, (b) Ir 4f, (c) Ni 2p, (d) C 1s.

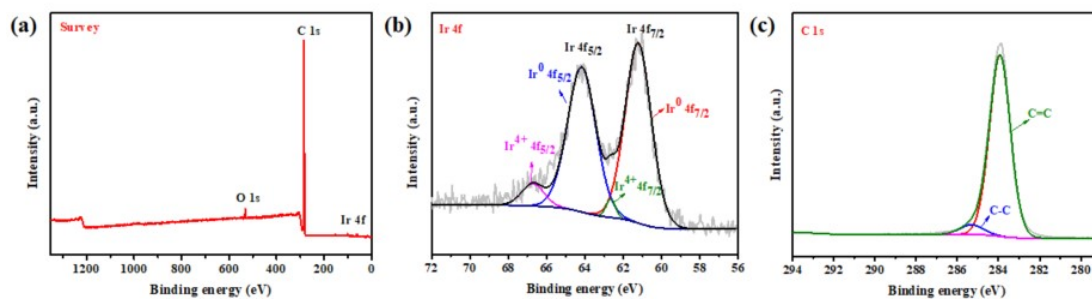

**Figure S4.** XPS spectra of Ir/C: (a) survey, (b) Ir 4f, (c) C 1s.

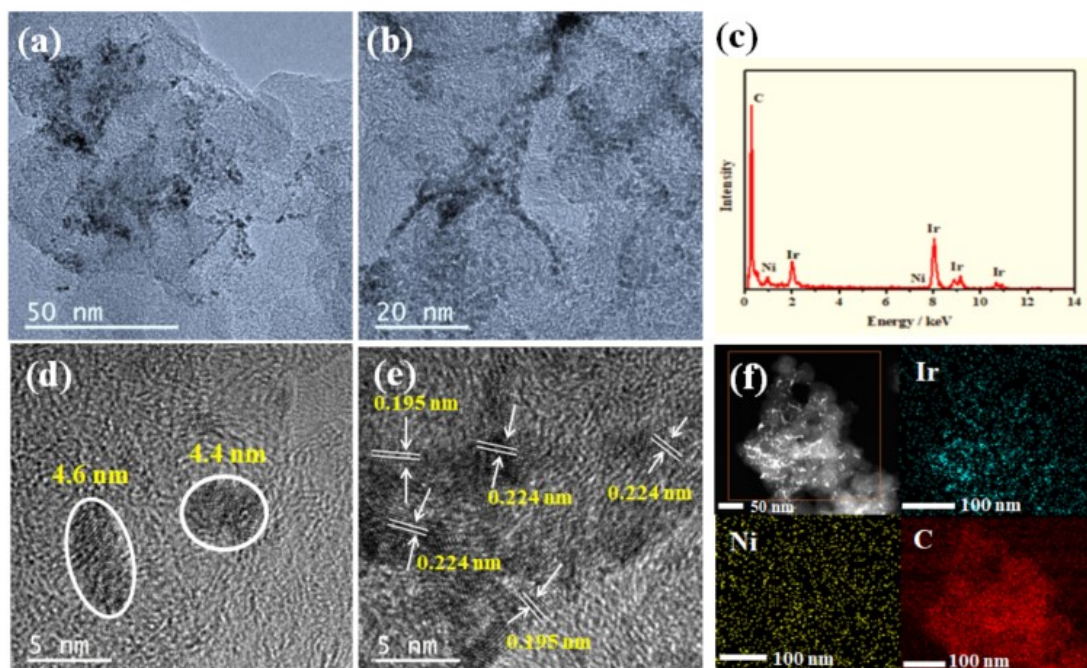

**Figure S5.** (a, b) TEM image and (c) EDS spectrum of IrNi/C. (d, e) HRTEM image of IrNi/C. (f) HAADF-STEM image, Ir STEM-EDS mappings, Ni STEM-EDS mappings, and C STEM-EDS mappings that were obtained for IrNi/C.

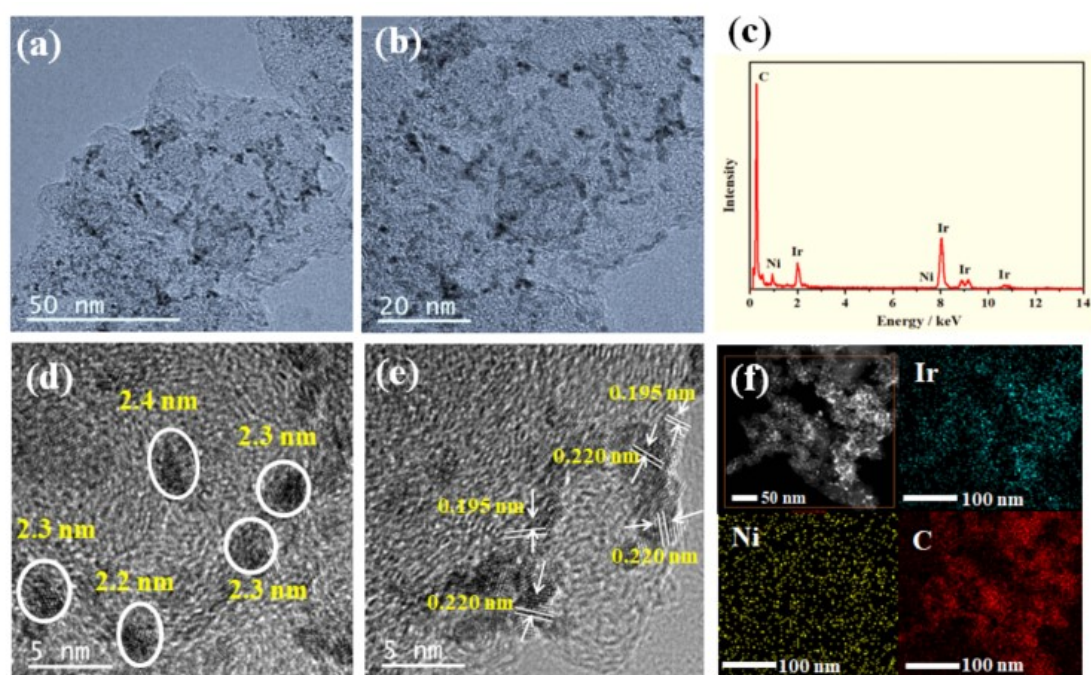

**Figure S6.** (a, b) TEM image and (c) EDS spectrum of Ir<sub>3</sub>Ni/C. (d, e) HRTEM image of Ir<sub>3</sub>Ni/C. (f) HAADF-STEM image, Ir STEM-EDS mappings, Ni STEM-EDS mappings, and C STEM-EDS mappings that were obtained for Ir<sub>3</sub>Ni/C.

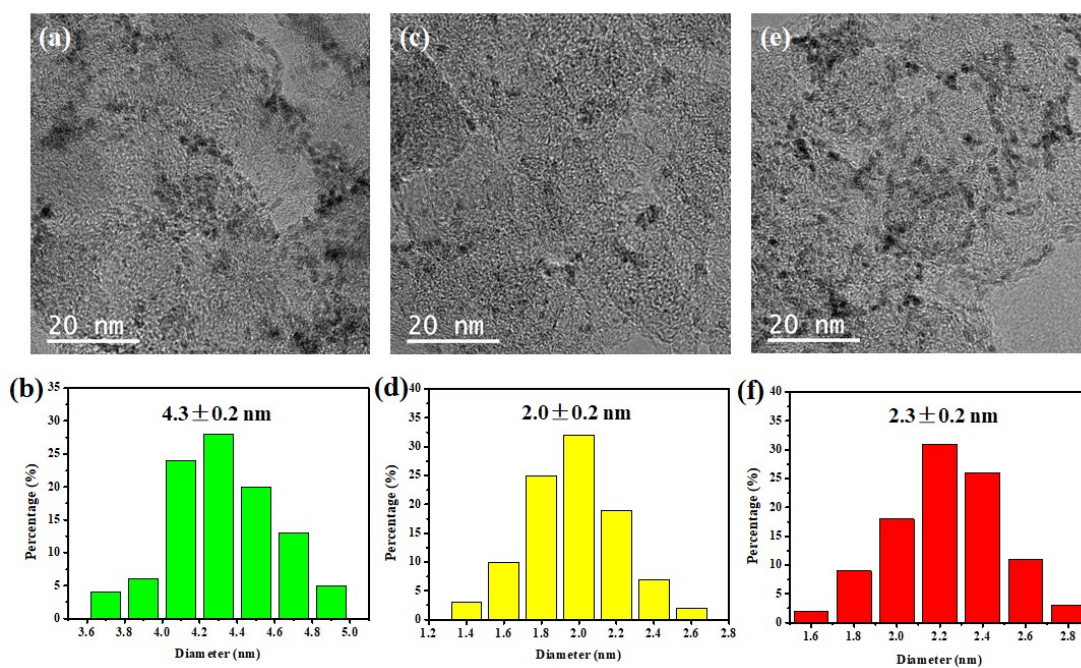

**Figure S7.** TEM image and particle size distribution of (a, b) IrNi/C, (c, d) Ir<sub>2</sub>Ni/C, (e, f) Ir<sub>3</sub>Ni/C, respectively.

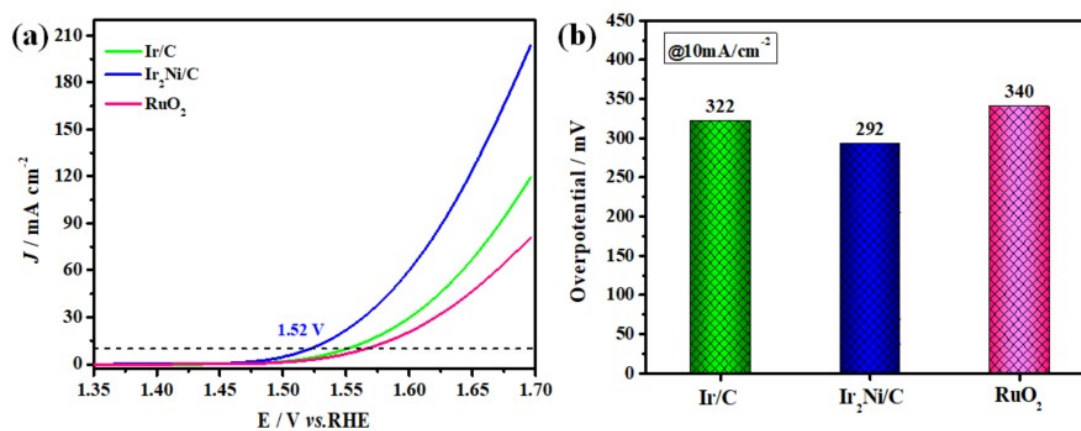

**Figure S8.** (a) LSV curves of the OER in 0.5 M H<sub>2</sub>SO<sub>4</sub> and (b) The overpotential at 10 mA cm<sup>-2</sup> of Ir/C, Ir<sub>2</sub>Ni/C and RuO<sub>2</sub>.

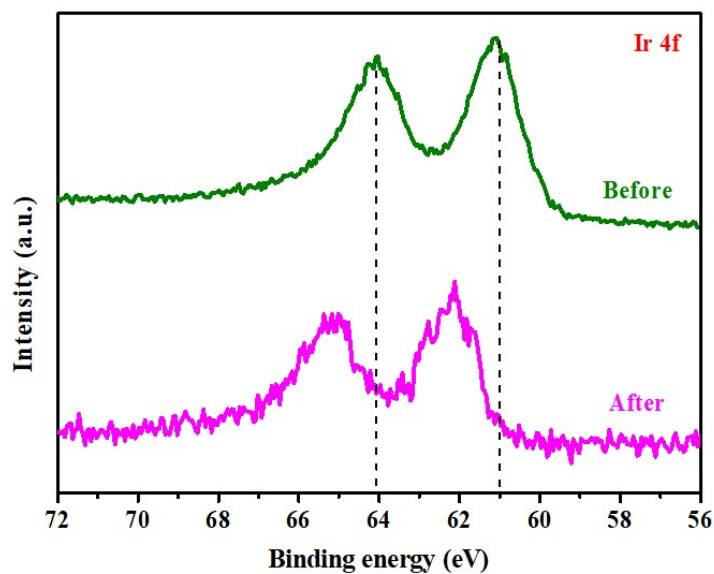

**Figure S9.** XPS spectra of Ir 4f for Ir<sub>2</sub>Ni/C before and after OER in 0.5 M H<sub>2</sub>SO<sub>4</sub>.

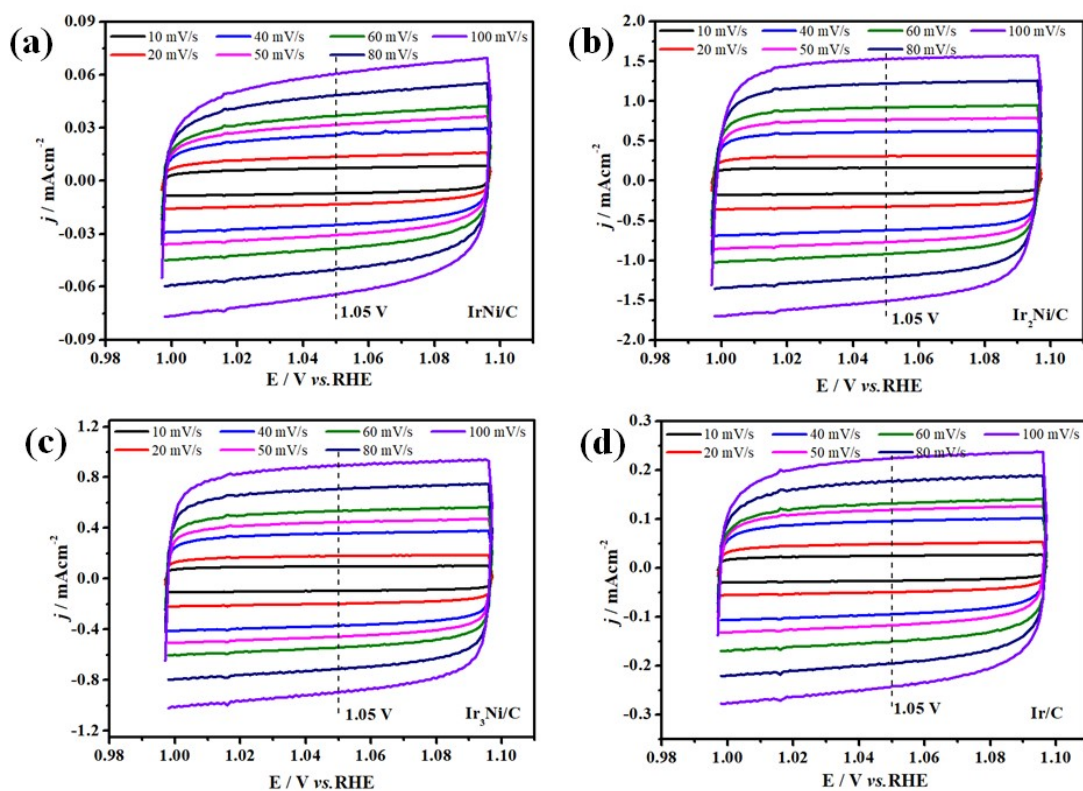

**Figure S10.** CV curves at different scan rates (10, 20, 40, 50, 60, 80, 100 mV s<sup>-1</sup>) for (a) IrNi/C, (b) Ir<sub>2</sub>Ni/C, (c) Ir<sub>3</sub>Ni/C, (d) Ir/C.

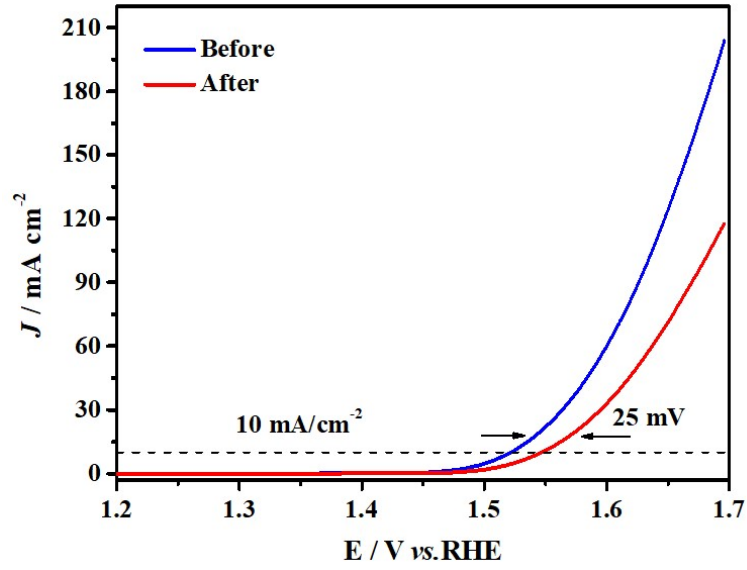

**Figure S11.** LSV curves for Ir<sub>2</sub>Ni/C in 0.5 M H<sub>2</sub>SO<sub>4</sub>, the blue line is before chronopotentiometry test and red line is after chronopotentiometry test.

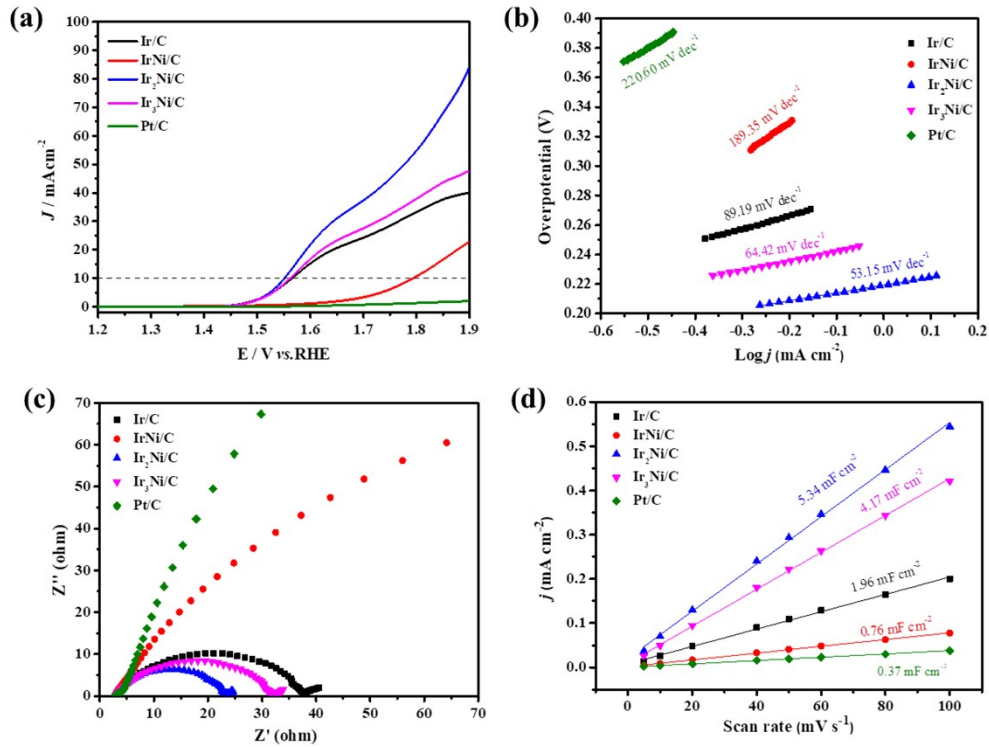

**Figure S12.** (a) LSV curves of the OER in 1 M KOH. (b) Tafel slopes. (c) EIS results of the catalysts. (d) Electrical double layer capacitor ( $C_{dl}$ ).

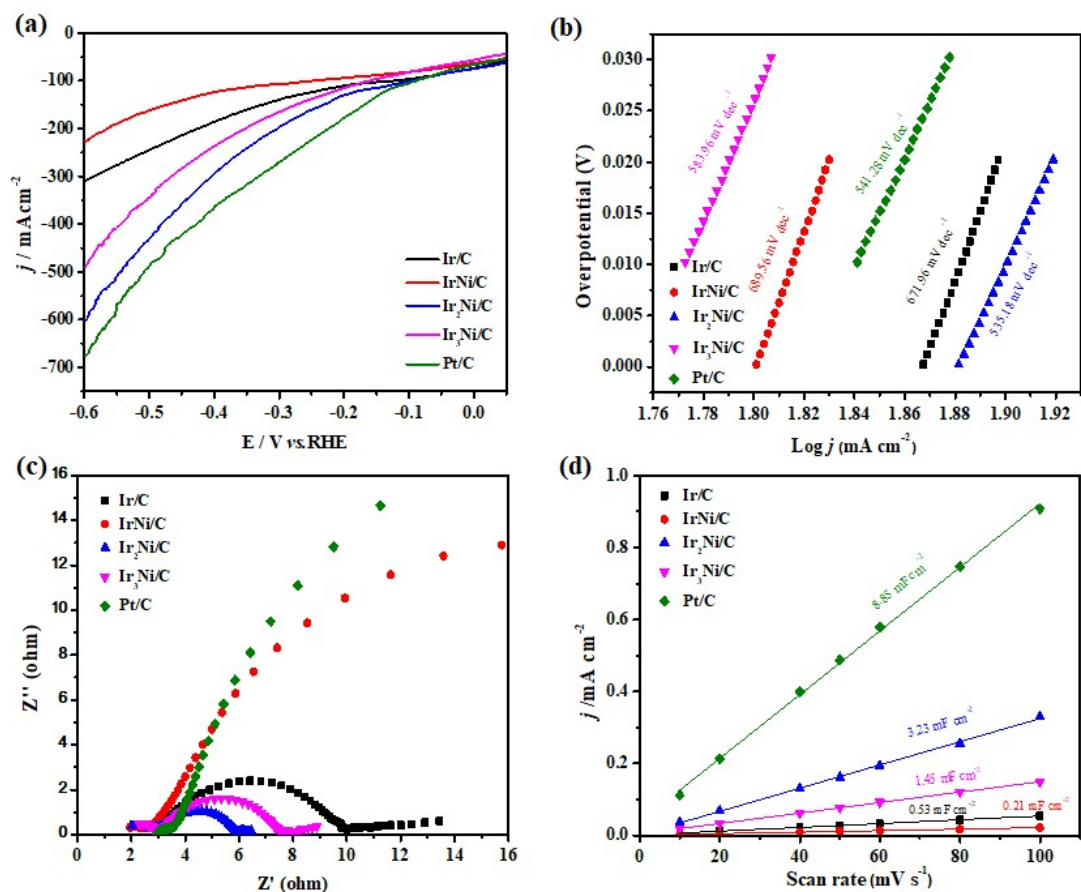

**Figure S13.** (a) LSV curves of the HER in 1 M KOH. (b) Tafel slopes. (c) EIS results of the catalysts. (d) Electrical double layer capacitor ( $C_{dl}$ ).

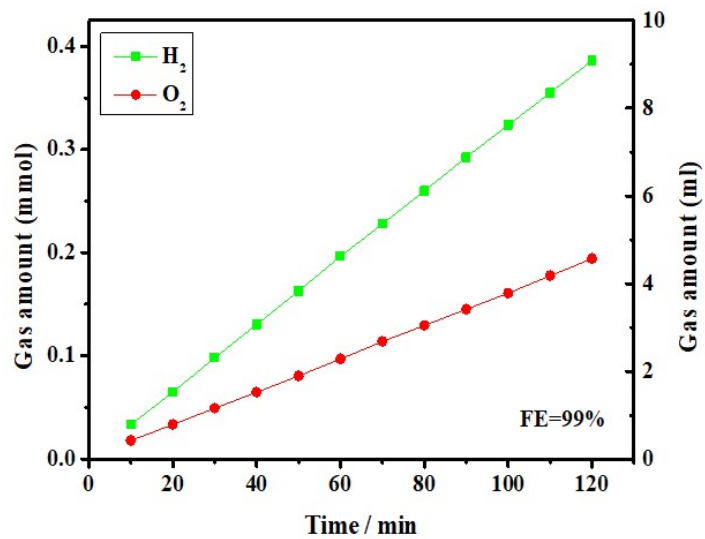

**Figure S14.** The Faradaic efficiency (FE) and amount of gas for HER and OER of Ir<sub>2</sub>Ni/C || Ir<sub>2</sub>Ni/C.

**Table S1.** Comparison of different catalysts.

| Sample               | Onset potential (V<br>vs. RHE) | $\eta$ @ 10 mA cm <sup>-2</sup><br>(mV) in 0.5 M<br>H <sub>2</sub> SO <sub>4</sub> | Tafel slope<br>(mV dec <sup>-1</sup> ) | Ir (wt%) | Ni (wt%) |
|----------------------|--------------------------------|------------------------------------------------------------------------------------|----------------------------------------|----------|----------|
| IrNi/C               | 1.55                           | 438                                                                                | 80.70                                  | 4.230    | 0.050    |
| Ir <sub>2</sub> Ni/C | 1.44                           | 292                                                                                | 47.83                                  | 5.140    | 0.047    |
| Ir <sub>3</sub> Ni/C | 1.45                           | 309                                                                                | 48.54                                  | 6.860    | 0.032    |
| Ir/C                 | 1.47                           | 322                                                                                | 49.05                                  | -        | -        |
| Pt/C                 | 1.60                           | 466                                                                                | 187.84                                 | -        | -        |

**Table S2.** OER electrocatalysts reported recently. Some of the information was not specified in the literature and was estimated according to data graphs.

| Catalyst             | Electrode | Loading<br>amount (mg<br>cm <sup>-2</sup> ) | Electrolyte                                     | $\eta$ /mV        | Reference |
|----------------------|-----------|---------------------------------------------|-------------------------------------------------|-------------------|-----------|
| Ir <sub>2</sub> Ni/C | GCE       | 0.32 (mg cm <sup>-2</sup> )                 | 0.5 M H <sub>2</sub> SO <sub>4</sub><br>1 M KOH | 292<br>321        | This work |
| Ir/C                 | GCE       | 20 $\mu$ g <sub>Ir</sub> cm <sup>-2</sup>   | 0.5 M H <sub>2</sub> SO <sub>4</sub><br>1 M KOH | 322<br>335        | This work |
| IrCoNi               | GCE       | 10 $\mu$ g <sub>Ir</sub> cm <sup>-2</sup>   | 0.5 M H <sub>2</sub> SO <sub>4</sub>            | 309               | 1         |
| Ir-NSG               | GCE       | 0.3 mg cm <sup>-2</sup>                     | 1 M PBS<br>0.1 M HClO <sub>4</sub><br>1 M KOH   | 307<br>275<br>265 | 2         |
| NiV-LDH              | GCE       | 2.6 mg cm <sup>-2</sup>                     | 1 M KOH                                         | 200               | 3         |
| NiVIr-LDH            |           | 1.2 mg cm <sup>-2</sup>                     | 1 M KOH                                         | 180               |           |
| NiVRu-LDH            |           | 0.7 mg cm <sup>-2</sup>                     | 1 M KOH                                         | 190               |           |

**Table S3.** HER electrocatalysts reported recently. Some of the information was not specified in the literature and was estimated according to data graphs.

| Catalyst             | Electrode | Loading amount<br>(mg cm <sup>-2</sup> )  | Electrolyte                                     | $\eta$ /mV       | Reference |
|----------------------|-----------|-------------------------------------------|-------------------------------------------------|------------------|-----------|
| Ir <sub>2</sub> Ni/C | GCE       | 0.32 (mg cm <sup>-2</sup> )               | 0.5 M H <sub>2</sub> SO<br>1 M KOH              | 30<br>34         | This work |
| Ir/C                 | GCE       | 20 $\mu$ g <sub>Ir</sub> cm <sup>-2</sup> | 0.5 M H <sub>2</sub> SO <sub>4</sub><br>1 M KOH | 54<br>56         | This work |
| IrCoNi               | GCE       | 10 $\mu$ g <sub>Ir</sub> cm <sup>-2</sup> | 0.5 M H <sub>2</sub> SO <sub>4</sub>            | 68               | 1         |
| Ir-NSG               | GCE       | 0.3 (mg cm <sup>-2</sup> )                | 1 M PBS<br>0.1 M HClO <sub>4</sub><br>1 M KOH   | 22<br>17<br>18.5 | 2         |
| IrCo@NC-<br>500      | GCE       | 0.285 (mg cm <sup>-2</sup> )              | 0.5 M H <sub>2</sub> SO <sub>4</sub><br>1 M KOH | 24<br>45         | 4         |

|                        |     |                                               |         |    |   |
|------------------------|-----|-----------------------------------------------|---------|----|---|
| DSIrNi@CN<br>Ts        | GCE | 19.2 $\mu\text{g}_{\text{Ir}} \text{cm}^{-2}$ | 1 M KOH | 17 | 5 |
| Ir <sub>3</sub> V-1000 | GCE | 19 $\mu\text{g}_{\text{Ir}} \text{cm}^{-2}$   | 1 M KOH | 9  | 6 |

## Reference

1. J. Feng, F. Lv, W. Zhang, P. Li, K. Wang, C. Yang, B. Wang, Y. Yang, J. Zhou, F. Lin, G.-C. Wang, S. Guo, *Adv. Mater.*, **29** (2017) 1703798.
2. Q. Wang, C. Q. Xu, W. Liu, S. F. Hung, H. Bin Yang, J. Gao, W. Cai, H. M. Chen, J. Li, B. Liu, *Nat. Commun.*, **11** (2020) 4246-4258.
3. D. Wang, Q. Li, C. Han, Q. Lu, Z. Xing, X. Yang, *Nat. Commun.*, **10** (2019) 3899-3911.
4. P. Jiang, J. Chen, C. Wang, K. Yang, S. Gong, S. Liu, Z. Lin, M. Li, G. Xia, Y. Yang, J. Su, Q. Chen, *Adv. Mater.*, **30** (2018) 1705324.
5. S. Liu, Z. Hu, Y. Wu, J. Zhang, Y. Zhang, B. Cui, C. Liu, S. Hu, N. Zhao, X. Han, A. Cao, Y. Chen, Y. Deng, W. Hu, *Adv. Mater.*, **8** (2020) 2006034.
6. L.-W. Chen, X. Guo, R.-Y. Shao, Q.-Q. Yan, L.-L. Zhang, Q.-X. Li, H.-W. Liang, *Nano Energy*, **21** (2018) 80-89.
